July 19, 2022

1  
2  
3  
4  
5  
6  
7  
8  
9  
10  
11  
12  
13  
14  
15  
16  
17  
18  
19  
20  
21  
22  
23  
24  
25  
26  
27  
28  
29

## *Trends in forest carbon offset markets in United States*

Authors:

Lilli Kaarakka<sup>1\*</sup> †, Julia Rothey<sup>2</sup> and Laura E. Dee<sup>2</sup> †

<sup>1</sup>Department of Natural Resources and Environmental Science, California Polytechnic University, San Luis Obispo, CA, USA

<sup>2</sup>Department of Ecology and Evolutionary Biology, University of Colorado Boulder, 1900 Pleasant Street, Boulder, Colorado 80309

\*Corresponding author: lkaarakk@calpoly.edu

### **Author contributions:**

Conceptualization: LK, LD

Methodology: LK

Data collection and analysis: LK, JR

Visualization: JR, LD, LK

Writing: LK, LD

**Keywords:** nature-based solutions, forest carbon offsets, improved forest management, forest carbon, payment for ecosystem services, wildfire risk, carbon credits

**Significance:** We assess trends in ownership, forest management practices and disturbance risks in existing forest carbon offset projects in the US.

### **Abstract**

Natural climate solutions are gaining international policy attention – with forests highlighted as a primary pathway for storing carbon. However, evaluations of additional carbon benefits and the permanence of forest carbon offsets projects remain scarce. In response, we compiled a novel database to analyze trends in existing forest management projects from the two largest offset project registries in the only carbon market in United States. We find that improved forest management projects represent 96% of all credits from forestry projects and 58% of all credits and span diverse practices with different potential for carbon storage. Our results also show that 26% of existing forest C offsets in the US are at risk from wildfire. From a policy perspective, our results underscore the need for more sophisticated insurance mechanisms for

39 forest carbon offset reversals, and for a framework to monitor and evaluate cumulative and  
40 future carbon benefits of forest-based offset projects.

41

## 42 INTRODUCTION

43 Nature-based solutions have recently gained attention in science and policy arenas as a  
44 way to offset carbon (C) emissions arising from other industries<sup>1,2</sup>. The demand for C offsets  
45 from nature-based solutions is expected to continue to increase as buyers prefer projects that  
46 demonstrate co-benefits beyond emission reductions (e.g., other ecosystem services beyond C)<sup>3-</sup>  
47<sup>5</sup>. In particular, carbon offset credits from forests have been in the spotlight. They are currently  
48 the primary type of projects in the global offset markets and have increased globally by 159%  
49 between 2020 and 2021<sup>6</sup>. For example, forest-based offsets represent 92% of offset credits  
50 issued in the Cap-and-Trade Program in California, USA. Given this rise in investment, an  
51 assessment of the trends and knowledge needs for these growing C offsets markets for forest  
52 projects is urgently needed.

53  
54 Forest carbon offset credits are being issued for projects store *additional* carbon relative  
55 to the status quo, including for avoided forest conversion, reforestation, and improved forest  
56 management. Improved forest management – in the market-context broadly defined as any forest  
57 management activity that increases C stocks on forested land – is the most common forest C  
58 offset project type in the US<sup>7,8</sup>. Improved forest management is an umbrella term for many  
59 forms of forest management and silvicultural practices, ranging from thinning to selection  
60 harvesting (reviewed in Kaarakka et al., 2021). These practices differ in their ability to store C  
61 relative to business-as-usual forest management and regulations in a region<sup>9,10</sup>. However,  
62 evidence on the extent to which different improved forest management practices provide  
63 *additional* C benefits remains patchy (Kaarakka et al., 2021). Further, most prior analyses of  
64 nature-climate solutions from forest management only consider one form of management  
65 (extended rotations)<sup>2,11</sup>, but a broader array of practices are being implemented or considered  
66 on-the-ground (Table 1). As a result, the types of improved forest management projects that have  
67 been credited for offsets (see Table 1) and their implications for C additionally remain to be  
68 quantified and verified.

69  
70 Forests are also facing a growing number of stressors that threaten C stocks<sup>12,13</sup>. As the  
71 climate changes, these stressors pose increasing challenges for meeting the other requirement of  
72 an offset: *permanence*, or the persistence and longevity of stored C from offset projects. In  
73 addition to changing temperature and precipitation patterns, mega-disturbances, such as fires and  
74 insect outbreaks, are increasing in intensity and frequency<sup>13-15</sup>. For example, in California, USA,  
75 eight of ten largest fires on record occurred within the past five years, burning almost seven  
76 million acres and releasing an unprecedented amount of CO<sub>2</sub> into the atmosphere<sup>16</sup>. Recent fires  
77 such as these raise concerns about the permanence associated with the forest carbon offsets,  
78 including where and how many forest carbon offsets could be reversed due to fires and other  
79 disturbances.

80

81 Forest management could play a role in reducing or exacerbating risks of carbon offset  
82 reversal from wildfire. Indeed, improved forest management practices differ in their ability to  
83 reduce risk of carbon loss from fires. For example, some practices, like extending harvest  
84 rotations, have been featured as a NCS pathway but may exacerbate risk of future carbon losses  
85 by retaining higher densities of aboveground biomass – some potential fuel for wildfires – longer  
86 in the landscape. In contrast, other practices like thinning reduces fuel loads by removing  
87 flammable biomass from forested landscapes. Yet, we lack a comprehensive understanding of  
88 risk to current offset projects over large spatial scales. Thus, the type and location of forest  
89 management practices will determine a project’s vulnerability to C losses and offset reversal.

90  
91 The types of forest management practices being implemented are likely to determine the  
92 additionality and permanence of offsets, creating a pressing need to evaluate which forest  
93 management practices are being credited for offsets. In response, we compile a new database of  
94 forest management offsets from the only offset market in the U.S. to address: 1) which type of  
95 forest management is applied in existing forest carbon projects, 2) what is the ownership  
96 structure in these projects, and finally, 3) what proportion of offsets are at high or moderate risk  
97 from wildfire? For our final question, we focus on threats to current offset permanence from  
98 wildfire, rather than other disturbances, because it is the major disturbance on forestland in the  
99 Western U.S. where many forest carbon offset projects are located. Wildfires are also expected  
100 to increase in extent, intensity, and frequency as a result of climate change, thus threatening  
101 forestland across the US<sup>17–22</sup>. Our analysis advances understanding of trends in forest carbon  
102 offset projects in the US by offering new details and perspectives for the of forestry projects  
103 involved in the offset credit market and assess the potential for carbon losses stemming from  
104 projects in wildfire prone areas.

## 105 **RESULTS**

106 As of November 2020, 92% of issued offsets issued by California Air Resources Board,  
107 originate from forest carbon offset projects<sup>8</sup>. Furthermore, 96% of these forestry projects are  
108 considered improved forest management and while, avoided conversion forest projects account  
109 for just 4% of the offsets issued. Improved forest management projects are heavily concentrated  
110 in the Western U.S.: 58% of forest offsets issued are from projects located in Alaska (AK),  
111 California (CA), Washington, Arizona, and Oregon, with the AK and CA accounting for 40% of  
112 issued forest offset credits (Figure 1, Table S1).

113

### 114 **Trends in Improved Forest Management offset projects**

115 Improved forest management projects received a total of 185,088,866 credits,  
116 corresponding to 185 million metric tonnes of CO<sub>2</sub>. Improved forest management projects  
117 represent 96% of all forestry sector credits and 58% of all credits issued by the two offset project  
118 registries (OPRs) (Table S1). We identified 257 projects listed as improved forest management

119 projects with American Carbon Registry or Climate Action Reserve, covering a total of  
120 8,442,750 acres. Of those projects, 165 had been issued offset credits as of late 2020, and these  
121 existing or past projects covered 5,778,774 acres. Individual projects acreage ranged from 117 to  
122 506,729 acres. Offset credits awarded to individual projects ranged from 2,616 to 15,456,787.  
123 Offset credits issued per acre ranged from 1.6 to 274, with a forest regeneration project in  
124 Mississippi receiving 808 credits per acre. Three projects were located outside of the United  
125 States, with one in Brazil and two in Madagascar. All other projects were distributed across 31  
126 states (Figure 1, Table S1).

127

## 128 **Forest Management Practices**

129 Almost half of all projects mentioned using retention harvesting, whereas 34% of projects  
130 listed no management or no commercial management, 36% listed uneven-aged forest  
131 management practices in their project documentation, and 16% of projects used even-aged  
132 management practices (Table 1). Selection harvesting was listed in 21%, precommercial thinning  
133 in 1%, and regeneration in 10% of projects, respectively, and 9% mentioned another thinning  
134 practice. Many projects listed multiple management strategies and therefore are counted in  
135 multiple categories for forest management.

136

137 Projects using no management or no commercial management of land accounted for  
138 62,721,277 offset credits and 1,712,089 acres (Table 1, Tables S1 and S2). Not all projects  
139 mentioned previous land use or history, but many had been managed for timber harvest. On  
140 average, these projects without management or commercial forest management received the most  
141 credits per acre – 46 credits per acre. Even-aged management was applied in 955,323 acres and  
142 these projects received in total 29,521,224 offset credits, averaging 31 credits per acre. Projects  
143 mentioning uneven-aged management were listed for projects covering 1,998,772 acres receiving  
144 an average of 33 credits per acre with 1,056,534 acres managed, at least in part, by selection  
145 harvesting, with these projects receiving 36 credits per acre. Some of form of retention  
146 harvesting was practiced in 3,368,514 acres, receiving on average 26 credits per acre – it is  
147 important to note that retention harvesting was listed as a management practice in even-aged and  
148 uneven-aged forest management projects. Projects using pre-commercial thinning on 67,103  
149 acres received 34 credit per acre on average, while those using other types of thinning received  
150 16 credits per acre. Other type of thinning was used on projects covering 1,095,299 acres.  
151 Projects using regeneration practices totaled 1,056,040 acres and received about 17 credits per  
152 acre.

153

## 154 **Ownership**

155 Companies own 75% of forest carbon offset project acres and received 69% of all credits  
156 issued (Figure 3, Table S2); four projects owned by Alaska Native Regional Corporations  
157 received 17% of all private company offsets and comprised 12% of all private company acres.

158 These four projects were not managed for large-scale, commercial forest harvest. Native  
159 American tribes own comparatively few projects but own the next largest amount of project land  
160 (15% of acres) and received 21% of offset credits. Non-governmental organizations owned 9%  
161 of offsets and 10% of project acres. Government organizations or municipalities owned few  
162 projects and acres but received over 1 million credits (0.6% of acres and offsets). Less than 0.3%  
163 and 0.7 % of projects acres and offsets respectively were owned by individuals or universities  
164 combined. We found that a majority of the forest offsets are bought by private companies (Figure  
165 2, Table S2), and these projects had no management or no commercial harvest in almost half the  
166 projects, with uneven-aged management was applied in third of the projects.  
167

## 168 **Risk of carbon losses from wildfire**

169 In the U.S., 1,100,485 project acres – or 19 % of all forest project acres and 26% of forest  
170 project offset credits – are in areas of moderate wildfire risk accounting for 48,683,288 of issued  
171 offset credits (28% of all improved forest management offset credits) (Figure 5; *see Methods for*  
172 *more details*). Out of these projects, 46 projects – representing 16% of all forest offset credits  
173 and 9% of all forest project acres in the country – are in California. These projects account for all  
174 of project acres and project credits in the state. Other moderate risk projects are located in  
175 Oregon (1 project, 4% of project acres and 68% of credits in the state), South Carolina (1 project,  
176 14% of project acres, 20% of credits) and Washington (2 projects, 98% of project acres and 95%  
177 of credits). Improved forest management projects tend to be located in areas with higher  
178 aboveground carbon densities, i.e., on forestland (Figure 2). Due to the productive nature of  
179 these forestlands, these project locations also tend to have high soil organic carbon and litter  
180 carbon densities (Figure 4).  
181

## 182 **DISCUSSION**

183 Forests as a natural climate solution have dominated the discourse on climate-focused  
184 land management. Analyzing existing forest carbon offset projects in the US, we find that forest-  
185 based offsets are the dominant offset type in the US market, and improved forest management  
186 projects account for 96% of forest offset credits and 60% of all offset credit issued by the OPRs.  
187 We found that projects that list no management or no commercial harvest received the highest  
188 number of offsets per acre, followed by retention and selection harvesting. In addition, we  
189 observed that forest offset projects are indeed located forests with higher above- and  
190 belowground carbon densities (Figure 3 and Figure 4) but also areas of moderate and potentially  
191 increasing wildfire risk (Figure 5).

192 This analysis complement, but differs from, recent research on natural-climate solutions  
193 from forest management<sup>2,11,23,24</sup>. Prior analyses have primarily focused extended rotations as the  
194 NCS pathway from forest management<sup>2,11</sup>. For example, Fargione et al. (2018) and Griscom et  
195 al. (2017) only include extending rotations in their analyses of NCS from forest management –

196 yet those practices can increase exposure to risks of catastrophic carbon losses from disturbances  
197 and miss many other forest management practices currently being certified for offsets (Figure 5).  
198 Here, we broaden the view on forest management practices that could be considered effective  
199 and sustainable in managing forest carbon, based on practices being certified on-the-ground in  
200 carbon offset markets (Table 1). This expanded view is important because 96% of all offsets are  
201 from improved forest management projects, and these projects include a diverse suite of  
202 practices (Figure 2). Most projects do not mention if extended rotations are happening as part of  
203 ‘no management or commercial harvest’ (Figure 2). From our broader analysis of improved  
204 forest management implemented on the ground, we also highlight several gaps and research  
205 needs for offsets and natural climate solutions from forest management discussed next.

206

### 207 *Risk of reversal due to wildfire*

208 Our analysis reveals that 28% of improved forest management projects are areas with  
209 moderate fire risk (Figure 5). While our analysis did not find any existing projects with very high  
210 or high wildfire hazard potential, we did find a project in California located on forestland with  
211 high wildfire hazard potential, which had been issued 847,985 offset credits, but the project was  
212 terminated in 2019 due to a wildfire. Yet, we anticipate increasing risk to offsets from fire and  
213 other disturbances, which are increasing in frequency and intensity with climate change<sup>12,13,25</sup>.  
214 For wildfire specifically, the convergence of warming temperatures and expanded ignition  
215 pressure from people is increasing the number of large human-caused wildfires and the fire-niche  
216 across the Western US<sup>26</sup> (Figure 5). As a result, wildfires could threaten carbon offsets from  
217 forests across the U.S. – not just in the flammable West. Increasing demand for forest based  
218 offset credits could also drive the expansion of projects further into fire-prone landscapes, where  
219 fuel conditions are further exacerbated by the unrepresented drought<sup>27–29</sup>. Finally, predictions of  
220 future wildfire occurrence and outcomes are inherently uncertain<sup>30</sup>, adding to the uncertainty  
221 associated with forest carbon offset permanence.

222

223 While low- and mixed-severity fires have historically been a natural phenomenon in the  
224 forested ecosystems of the Western US, human influence (e.g., grazing, land conversion,  
225 urbanization, fire suppression) has resulted in exclusion of fires in the region<sup>31,32</sup>. Decades of  
226 fire suppression have altered the structure and composition of many forests in the western United  
227 States, some of which are now also facing the compound disturbance effects of fire, bark beetles  
228 and drought<sup>27</sup>. In fire-suppressed forest stands, uncontrolled, high intensity wildfires tend to be  
229 severe in terms of their impact on aboveground carbon stocks. Forest stands with high  
230 aboveground carbon densities tend to be more vulnerable to forest fires due to overstocking of  
231 flammable biomass following fire suppression. If a high-intensity fire were to occur, carbon  
232 losses from these stands could be significant. If left untreated for fuel, forestland can release  
233 more CO<sub>2</sub> once they burn than thinned ones as large, as catastrophic wildfires tend to consume  
234 all available biomass, including the litter layer and surface layers of the soil<sup>32,33</sup>.

235

236           These findings about CO<sub>2</sub> emissions from untreated (i.e., no fuel management) forestland  
237 with legacy of fire suppression have important implications for many forestry projects in the  
238 offset credit program. First, forest carbon offset projects are situated within areas of high above-  
239 and belowground carbon densities (Figure 3, Figure 4), suggesting that these areas (i.e., forest  
240 stands) have been excluded from fire or other large-scale disturbances in the recent past. Second,  
241 many locations had been previously managed for timber harvest thus implying that the initial or  
242 project start aboveground carbon stocks were considerable. Finally, we find that a  
243 disproportionally large number of forest carbon offset project land (i.e., forestland) is left  
244 untreated or not managed, and just a few explicitly use thinning or other types of fuel  
245 management practices.

246  
247           Guidelines for managing fuels on these forestlands participating in offset programs is  
248 urgently needed given the risks – particularly in California and across the western states where  
249 wildfires are common. To date, only six existing forest offset projects in our database mention  
250 prescribed burning as a management practice and only one of these projects was in the West (in  
251 New Mexico). To that end, we recommend that improved forest management further expand its  
252 definition (reviewed in <sup>7</sup> to include active fire and fuel management. In addition, future markets  
253 from other sectors (e.g., agricultural crop losses) that face losses from events like drought could  
254 provide some guidance for these emerging markets <sup>e.g., 34</sup>.

255  
256

### 257 *Finding a sustainable path for forest carbon offsets*

258           In operational forestry, improved forest management is not well-defined, and the long-  
259 term carbon benefits of most forestry practices considered improved forest management remain  
260 to be tested <sup>7,9</sup>. Currently, markets are certifying forest offsets projects but offer limited  
261 accountability and transparency for additionality – the demonstrated effects of carbon  
262 sequestration in the forest stand under improved forest management practices. Large quantities  
263 of offset credits are awarded to projects at the start of the project (i.e., initial tracking period),  
264 particularly for improved forest management projects <sup>35,36</sup>. Currently, there are no policy  
265 instruments or regulation in the California offset credit market focusing on oversight and  
266 accountability of forest offset projects, and the governance for environmental integrity is focused  
267 on the development (i.e., the protocols) and start of the forest project <sup>36,37</sup>. The current process  
268 has put into question the added carbon benefits of these projects <sup>36</sup>

269           Our analysis reveals that credited projects vary to a great degree in their disclosure about  
270 the planned or completed forest management activities for the project area. While several forest  
271 carbon offset projects provided detailed descriptions of the management objectives, and by that  
272 extension forest management practices, many offered little detailed information on what type of  
273 management activities will take place and when. For example, when managing for forest carbon,  
274 there is considerable ambiguity associated with practices listed “retention” (Table 1). However,



275 *what* is retained in the forest stand and for what *purpose* was not implicitly highlighted in the  
276 forest carbon offset project documentation. Going forward, a thorough and transparent planning  
277 and monitoring network for the forest practices applied in these projects, including retention  
278 harvest practices, would aid in determining the extent and scale of additional carbon benefits.  
279 Forming a new partnership between the entities involved with the carbon offset market,  
280 including the state of California, developers of the forest offset protocols (OPRs), and finally, the  
281 forest research community could assist in building a framework for assessing forest carbon offset  
282 opportunities on forestland in California.

283  
284 Finally, we recommend several future directions for research, partnerships, and policies  
285 around forest management offsets. While assessing the effectiveness of California's offset  
286 market to demonstrate significant carbon emission reductions is beyond the scope of this article,  
287 we call for substantial investments into oversight of credited and existing, and future forest offset  
288 projects. Our results further highlight that a significant portion of existing forest carbon offsets  
289 face a risk of reversal through wildfire, including all the existing projects in California. Future  
290 research and partnerships could build a body of evidence for not only how these improved forest  
291 management strategies impact carbon, but also the extent to which they mitigate or exacerbate  
292 risk from disturbances such as wildfire<sup>31,38,39</sup> and pest outbreaks<sup>29</sup>. For example, some improved  
293 forest management strategies such as thinning reduce fuel loads, but thinning only represented  
294 around 10% of credits, whereas no management of projects could increase exposure to risk of  
295 catastrophic carbon losses and was the dominant practice in 34% of certified projects (Table 1).  
296 Specifically including climate-driven disturbance risks such as wildfire in the forest offset  
297 protocol could increase the robustness of the offset credit program and help accurately determine  
298 the risk associated with each project. From a policy perspective, these results underscore that  
299 more sophisticated insurance mechanisms are needed for forest carbon offset losses and  
300 reversals, as well for the validation of long-term carbon benefits from different types of forest  
301 management.

302

## 303 **MATERIALS AND METHODS**

304 We review trends in forest carbon offsets, in terms of the types of forestry management  
305 practices listed, land ownership, number and location of issued offset credits, and potential risk  
306 to these offsets from wildfire. To do so, we compiled a novel database of all forestry projects  
307 from the two largest offset project registries in the US's only carbon market (California's Cap-  
308 and-Trade and Voluntary Offset programs): the Climate Action Reserve (CAR) and the  
309 American Carbon Registry (ACR). In these programs, an offset credit represents an emission  
310 reduction of one metric tonne of CO<sub>2</sub>.

311

312 *Offset Databases*

313 As of February 2022, 214,981,710 forest carbon offset credits in total (totaling to 215 Tg  
314 CO<sub>2</sub>e) have been issued through California Air Resources Board <sup>8</sup>. In November 2020, we  
315 accessed, downloaded, and compiled the data from two largest offset project registries (OPRs) in  
316 the United States; the Climate Action Reserve (CAR) and the American Carbon Registry (ACR),  
317 which track offset projects and issue offset credits, and are responsible for verifying and  
318 certifying emission reductions (see SM for details). We examined all “Forest Carbon” projects  
319 from the CAR, and all “Improved Forest Management” (IFM) projects from the ACR. Our  
320 database included 143 Forest Carbon projects from CAR (as of November 16, 2020) and 139  
321 IFM ACR (as of December 4, 2020). Information on the project ID, developer, name, owner,  
322 year registered and/or listed, status, ARB status, site location and number of offsets issued where  
323 retrieved directly from the OPRs.

324  
325 From each project document we gathered information on management practices and  
326 project acreage (Table 1; for more details, see Supplementary Materials). Practices were sorted  
327 into 8 main categories based on the definitions from the Southwest Fire Science Consortium’s  
328 silviculture terminology and the US Forest Services’ reforestation glossary (see Table 1).  
329 Ownership type was assigned based on information in the project submittal form. If more  
330 information was required, the organization’s website was referenced. Project documents were  
331 reviewed in November and December 2020. Management information was not available for 32  
332 projects. Of those, 4 had been canceled, 4 were inactive and 2 were completed. Three projects  
333 with no management information had received offset credits. We contacted project owners for 25  
334 projects and heard back from owners of 21 projects but were unable to attain additional  
335 information on management practices. Our analysis includes active offset projects that have  
336 received offset credits and includes completed projects but not planned (ARB-status listed as  
337 *proposed*) or inactive projects (ARB-status listed as *inactive*). We obtained project coordinates  
338 from project paperwork and approximated coordinates when not available (see SM for details).  
339 From this data, we calculated the total credits and acreage in each state and in each management  
340 and ownership categories.

341  
342 *Litter and soil carbon maps*

343 We overlaid project locations on maps of soil carbon and litter carbon data from Cao et.  
344 al. <sup>40</sup> and onto maps of aboveground carbon calculated from the USDA Forest Services’ National  
345 Forest Inventory data <sup>41</sup> and the ‘rFIA’ package v3.1 <sup>42</sup> (see SM for details). All analysis and  
346 figures were completed using R version 4.0.4 (R Core Team, 2021).

347  
348 *Wildfire risk for existing forest projects*

349 We overlaid forest offset project location data with Wildfire hazard potential (WHP),  
350 retrieved (February 15, 2021) from USDA <sup>43,44</sup>. Dillon and Gilbertson-Day <sup>43</sup> modeled WHP  
351 using spatial datasets of wildfire likelihood and intensity generated in the Large Fire Simulator  
352 program, spatial information on fuels and vegetation data from LANDFIRE 2014 and point

353 locations of past fires. Each project's county mean categorical WHP was used as a proxy for the  
354 project area WHP. For projects in multiple counties, the county WHPs were averaged and each  
355 WHP-value, if a fraction, was rounded down. State WHP was used for projects that did not  
356 specify a county or that were in multiple states. Based on this WHP data, greater than 4 on a  
357 scale of 0–5 is considered a high fire risk location, whereas 3 is considered a moderate risk  
358 location.

359

## 360 **Acknowledgements**

### 361 **Funding:**

362 The authors thank the Finnish Cultural Foundation for funding to LK  
363 University of Colorado Boulder Undergraduate Research Opportunity Program for supporting  
364 JR.

365 **Competing interest:** All authors declare no competing interests for this study.

366

### 367 **Data and materials availability:**

368 Data will be published as supplementary files upon acceptance of the manuscript and was made  
369 available for reviewers to evaluate the manuscript. Code to produce the figures can be found at  
370 the project GitHub page: [lillikaarakka/ifm\\_projects\\_2022](https://github.com/lillikaarakka/ifm_projects_2022).

371

372

373

374 1. Pörtner, H.-O. *et al.* *Scientific outcome of the IPBES-IPCC co-sponsored workshop on*  
375 *biodiversity and climate change.* (IPBES secretariat, 2021). doi:10.5281/zenodo.4659158.

376 2. Fargione, J. E. *et al.* Natural climate solutions for the United States. *Science Advances* **4**,  
377 eaat1869 (2018).

378 3. Forest Trends' Ecosystem Marketplace. *Financing Emissions Reductions for the Future: State*  
379 *of the Voluntary Carbon Markets 2019.* 1–19  
380 <https://app.hubspot.com/documents/3298623/view/63001900?accessId=eb4b1a> (2019).

381 4. Hamrick, K. & Gallant, M. *Voluntary Carbon Market Insights: 2018 Outlook and First-*  
382 *Quarter Trends.* (2018).

383 5. Salzman, J., Bennett, G., Carroll, N., Goldstein, A. & Jenkins, M. The global status and trends  
384 of Payments for Ecosystem Services. *Nature Sustainability* **1**, 136–144 (2018).

385 6. World Bank. *State and Trends of Carbon Pricing 2021.*  
386 <https://openknowledge.worldbank.org/handle/10986/37455> (2022).

387 7. Kaarakka, L., Cornett, M., Domke, G., Ontl, T. & Dee, L. E. Improved forest management as  
388 a natural climate solution: A review. *Ecol Solutions Evid* **2**, e12090 (2021).

389 8. California Air Resources Board. Compliance Offset Program. ARB Offset Credit Issuance.  
390 <https://ww3.arb.ca.gov/cc/capandtrade/offsets/offsets.htm> (2022).

391 9. Marland, E. *et al.* *Understanding and Analysis: The California Air Resources Board Forest*  
392 *Offset Protocol.* (Springer Briefs in Environmental Science, Springer, 2017). doi:10.1007/978-3-  
393 319-52434-4.

394 10. Ruseva, T. *et al.* Additionality and permanence standards in California's Forest Offset  
395 Protocol: A review of project and program level implications. *Journal of Environmental*  
396 *Management* **198**, 277–288 (2017).

397 11. Griscom, B. W. *et al.* Natural climate solutions. *Proceedings of the National Academy of*  
398 *Sciences* **114**, 11645–11650 (2017).

399 12. Millar, C. I., Stephenson, N. L. & Stephens, S. L. Climate change and forests of the future:  
400 managing in the face of uncertainty. *Ecological Applications* **17**, 2145–2151 (2007).

401 13. Millar, C. & Stephenson, N. L. Temperate forest health in an era of emerging  
402 megadisturbance. *Science* **349**, 823–826 (2015).

403 14. McDowell, N. G. *et al.* Pervasive shifts in forest dynamics in a changing world. *Science* **368**,  
404 eaaz9463 (2020).

- 405 15. Seidl, R. *et al.* Forest disturbances under climate change. *Nature Climate Change* **7**, 395–402  
406 (2017).
- 407 16. CALFIRE - California Department of Forestry and Fire Protection . *Top 20 Largest*  
408 *California Wildfires*. (2021).
- 409 17. Abatzoglou, J. T. & Williams, A. P. Impact of anthropogenic climate change on wildfire  
410 across western US forests. *Proc National Acad Sci* **113**, 11770–11775 (2016).
- 411 18. Williams, A. P. *et al.* Observed impacts of anthropogenic climate change on wildfire in  
412 California. *Earth's Future* **7**, 892–910 (2019).
- 413 19. Halofsky, J. E., Peterson, D. L. & Harvey, B. J. Changing wildfire, changing forests: the  
414 effects of climate change on fire regimes and vegetation in the Pacific Northwest, USA. *Fire*  
415 *Ecol* **16**, 4 (2020).
- 416 20. Reilly, M. J. *et al.* Cumulative effects of wildfires on forest dynamics in the eastern Cascade  
417 Mountains, USA. *Ecol Appl Publ Ecol Soc Am* **28**, 291–308 (2018).
- 418 21. Bowd, E. J., Banks, S. C., Strong, C. L. & Lindenmayer, D. B. Long-term impacts of wildfire  
419 and logging on forest soils. *Nat Geosci* **12**, 113–118 (2019).
- 420 22. Goodwin, M. J., Zald, H. S. J., North, M. P. & Hurteau, and M. D. Climate-driven tree  
421 mortality and fuel aridity increase wildfire's potential heat flux. *Geophys Res Lett* (2021)  
422 doi:10.1029/2021gl094954.
- 423 23. Mori, A. S. *et al.* Biodiversity–productivity relationships are key to nature-based climate  
424 solutions. *Nat Clim Change* **11**, 543–550 (2021).
- 425 24. Bossio, D. A. *et al.* The role of soil carbon in natural climate solutions. *Nature Sustainability*  
426 **3**, 391–398 (2020).
- 427 25. Dale, V. H., Joyce, L. A., McNulty, S. & Neilson, R. P. The interplay between climate  
428 change, forests, and disturbances. *Sci Total Environ* **262**, 201–4 (2000).
- 429 26. Balch, J. K. *et al.* Human-started wildfires expand the fire niche across the United States. *P*  
430 *Natl Acad Sci Usa* **114**, 2946–2951 (2017).
- 431 27. Stephens, S. L. *et al.* Drought, Tree Mortality, and Wildfire in Forests Adapted to Frequent  
432 Fire. *Bioscience* **68**, 77–88 (2018).
- 433 28. Earles, J. M., North, M. P. & Hurteau, M. D. Wildfire and drought dynamics destabilize  
434 carbon stores of fire-suppressed forests. *Ecol Appl* **24**, 732–740 (2014).

- 435 29. Quirion, B. R. *et al.* Insect and disease disturbances correlate with reduced carbon  
436 sequestration in forests of the contiguous United States. *Frontiers For Global Change* **4**, 716582  
437 (2021).
- 438 30. Cabiyo, B. *et al.* Innovative wood use can enable carbon-beneficial forest management in  
439 California. *P Natl Acad Sci Usa* **118**, e2019073118 (2021).
- 440 31. Hessburg, P. F. *et al.* Climate and wildfire adaptation of inland Northwest US forests. *Front*  
441 *Ecol Environ* (2021) doi:10.1002/fee.2408.
- 442 32. Hurteau, M. D., Koch, G. W. & Hungate, B. A. Carbon protection and fire risk reduction:  
443 toward a full accounting of forest carbon offsets. *Front Ecol Environ* **6**, 493–498 (2008).
- 444 33. Hurteau, M. D., North, M. P., Koch, G. W. & Hungate, B. A. Opinion: Managing for  
445 disturbance stabilizes forest carbon. *Proceedings of the National Academy of Sciences* 1–3  
446 (2019) doi:10.1073/pnas.1905146116.
- 447 34. Leng, G. & Hall, J. Crop yield sensitivity of global major agricultural countries to droughts  
448 and the projected changes in the future. *Sci Total Environ* **654**, 811–821 (2019).
- 449 35. Anderson, C. M., Field, C. B. & Mach, K. J. Forest offsets partner climate change  
450 mitigation with conservation. *Frontiers in Ecology and the Environment* **15**, 359–365 (2017).
- 451 36. Badgley, G. *et al.* Systematic overcrediting in California’s forest carbon offsets program.  
452 *Global Change Biol* **28**, 1433–1445 (2022).
- 453 37. Haya, B. *et al.* Managing uncertainty in carbon offsets: insights from California’s  
454 standardized approach. *Clim Policy* **20**, 1–15 (2020).
- 455 38. Prichard, S. J. *et al.* Adapting western North American forests to climate change and  
456 wildfires: 10 common questions. *Ecol Appl* e02433 (2021) doi:10.1002/eap.2433.
- 457 39. Schoennagel, T. *et al.* Adapt to more wildfire in western North American forests as climate  
458 changes. *Proceedings of the National Academy of Sciences* **114**, 4582–4590 (2017).
- 459 40. Cao, B., Domke, G. M., Russell, M. B. & Walters, B. F. Spatial modeling of litter and soil  
460 carbon stocks on forest land in the conterminous United States. *Science of the Total Environment*  
461 **654**, 94–106 (2019).
- 462 41. Gray, A., Brandeis, T., Shaw, J., McWilliams, W. & Miles, P. Forest Inventory and Analysis  
463 Database of the United States of America (FIA). *Biodivers Ecol* **4**, 225–231 (2012).
- 464 42. Stanke, H., A.O., F., A., W., B., W. & G., D. rFIA: An R package for estimation of forest  
465 attributes with the US Forest Inventory and Analysis database. *Environ Model Software* **127**,  
466 104664 (2020).

467 43. Dillon, G. K. & Gilbertson-Day, J. *Wildfire Hazard Potential for the United States (270-m)*,  
468 *version 2020 (3rd edition)*. <https://doi.org/10.2737/RDS-2015-0047-3> (2020).

469 44. Dillon, G. K., J, M. & F, F. Wildland Fire Potential: A Tool for Assessing Wildfire Risk and  
470 Fuels Management Needs. in *Proceedings of the large wildland fires conference; May 19-23,*  
471 *2014; Missoula, MT. Proc. RMRS-P-73* 60–76 (Fort Collins, CO: U.S. Department of  
472 Agriculture, Forest Service, Rocky Mountain Research Station, 2014).

473

**Table 1** Forest management terminology used in project documentation for existing forest C offset projects, and the total forest carbon offsets credits issued (as of December 2020) per management practice/activity mentioned in project documentation. Note that some of the offset project documents mention multiple management practices and/or activities, so some offsets are listed multiple times in the table.

| <b>Management practice or activity</b> | <b>Definition</b>                                                                                                                                                               | <b>Projects mentioned one or more of these forest management terms</b>                                                                                                                                                                                                                                                                                                                                             | <b>Total offsets issued</b> | <b>% of offset credits issued</b> |
|----------------------------------------|---------------------------------------------------------------------------------------------------------------------------------------------------------------------------------|--------------------------------------------------------------------------------------------------------------------------------------------------------------------------------------------------------------------------------------------------------------------------------------------------------------------------------------------------------------------------------------------------------------------|-----------------------------|-----------------------------------|
| No management or no commercial harvest | No forest management or commercial harvest is applied.                                                                                                                          | No management, no commercial harvest, no harvest                                                                                                                                                                                                                                                                                                                                                                   | 62,721,277                  | 34%                               |
| Uneven-aged management                 | Stands that have three or more age classes throughout the cutting cycle.                                                                                                        | Extended rotations, retention harvesting, selection harvesting                                                                                                                                                                                                                                                                                                                                                     | 65,983,843                  | 36%                               |
| Even-aged management                   | Even-aged management comprises of a repetitive rotation cycle of distinct phases, including the regeneration, intermediate treatments (incl. thinning) and final harvesting.    | Clearcut, clearcutting, even-aged management, even-aged stands, seed tree removal, two-aged management, extended rotations                                                                                                                                                                                                                                                                                         | 29,521,224                  | 16%                               |
| Retention                              | Harvesting method in which some structural elements are retained at the time of harvest, such as mature trees and dead wood to increase the structural complexity of the stand. | Basal area and diameter retention, canopy retention, greater retention, overstory retention, retain biomass, retain dead wood, retain dead wood and recruitment trees, retain dominant and co-dominant trees, retain harvestable stock, retain recruitment trees, retention harvesting to promote shade-intolerant species, retention of wildlife and recruitment trees, single tree retention, variable retention | 87,817,348                  | 47%                               |



|                         |                                                                                                                                                           |                                                                                                                                                                                                                                                                                                                                           |            |     |
|-------------------------|-----------------------------------------------------------------------------------------------------------------------------------------------------------|-------------------------------------------------------------------------------------------------------------------------------------------------------------------------------------------------------------------------------------------------------------------------------------------------------------------------------------------|------------|-----|
| Selection harvest       | Individual trees or smaller groups of trees are removed instead of all trees. Produces stands with several age-classes.                                   | Group selection, hardwood control, hardwood release, improving species composition, increase standing and lying dead wood, old growth protection, release of well stocked conifer stands, rotation harvesting limited by basal area, selection cuts, selection for hardwoods and loblolly pine, single-tree selection, transition harvest | 38,008,407 | 21% |
| Regeneration            | Re-establishment of the forest stand, through natural (from existing seeds, samplings in the stand) or artificial regeneration (planting, direct seeding) | Natural regeneration, planted seedlings, planting, prescribed burns, reforestation/replanting, regeneration harvesting with reserves, rehabilitation, rehabilitation of understocked areas, replanting shelterwood, shelterwood regeneration, shelterwood system                                                                          | 17,777,969 | 10% |
| Pre-commercial thinning | Removal of specific trees or age-class of trees before trees reach merchantable size.                                                                     | Pre-commercial thinning                                                                                                                                                                                                                                                                                                                   | 2,245,671  | 1%  |
| Other thinning          | Removal of specific trees or age-class of trees to improve the growth or health of the remaining trees.                                                   | Commercial thinning, intermediate thinning, variable-density thinning                                                                                                                                                                                                                                                                     | 17,240,143 | 9%  |

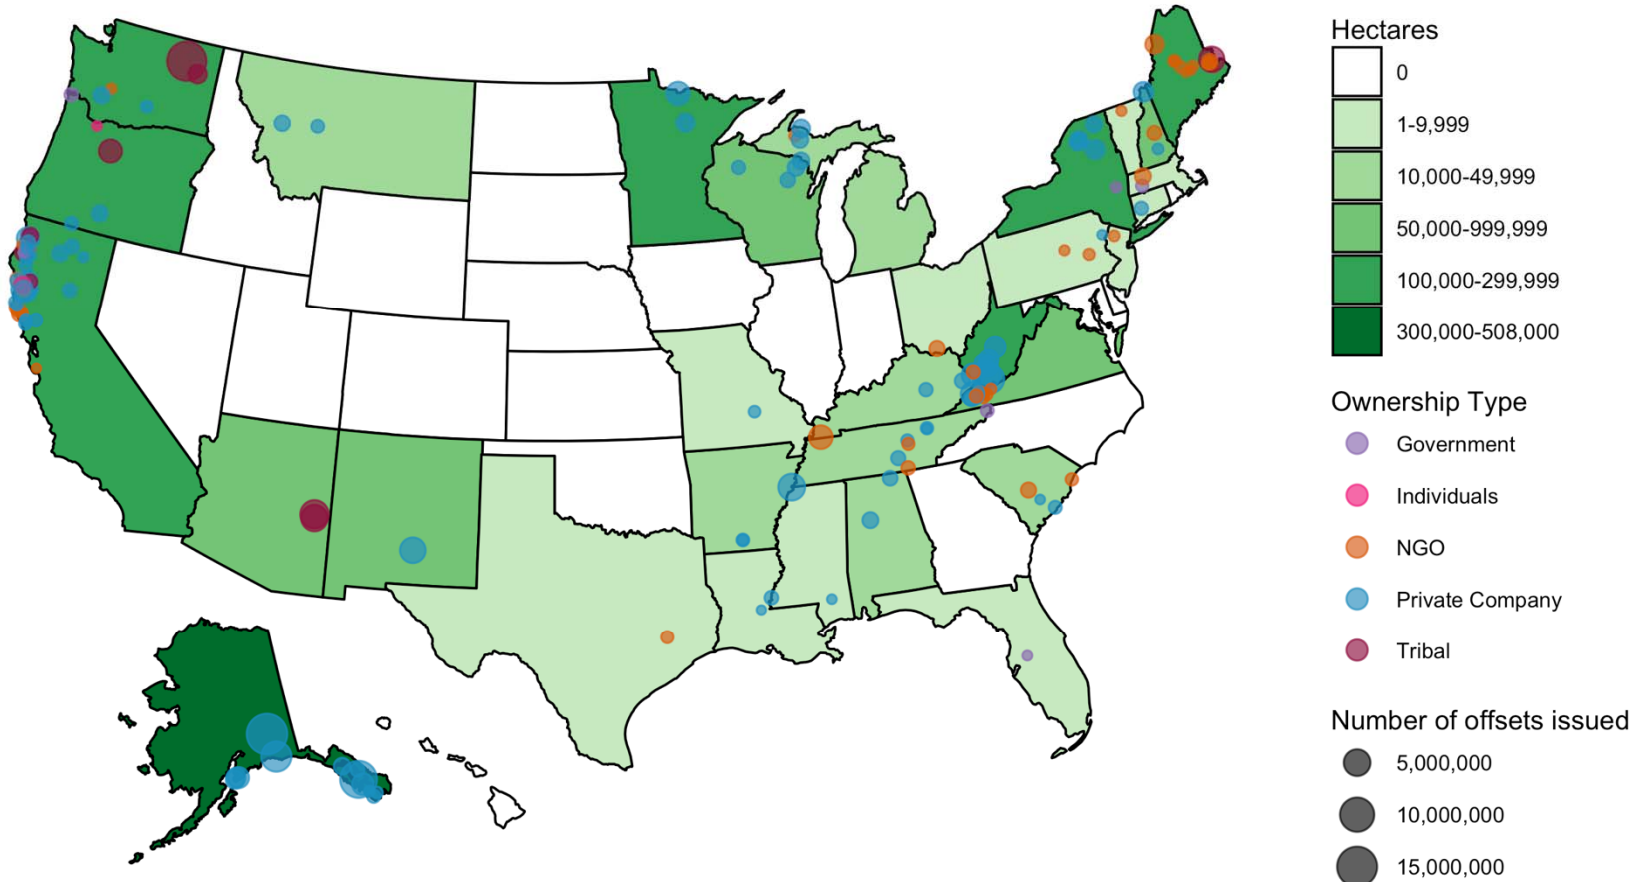

**Figure 1** Locations of existing forest carbon offset projects (green, in hectares) in the United States and per ownership group (dots).

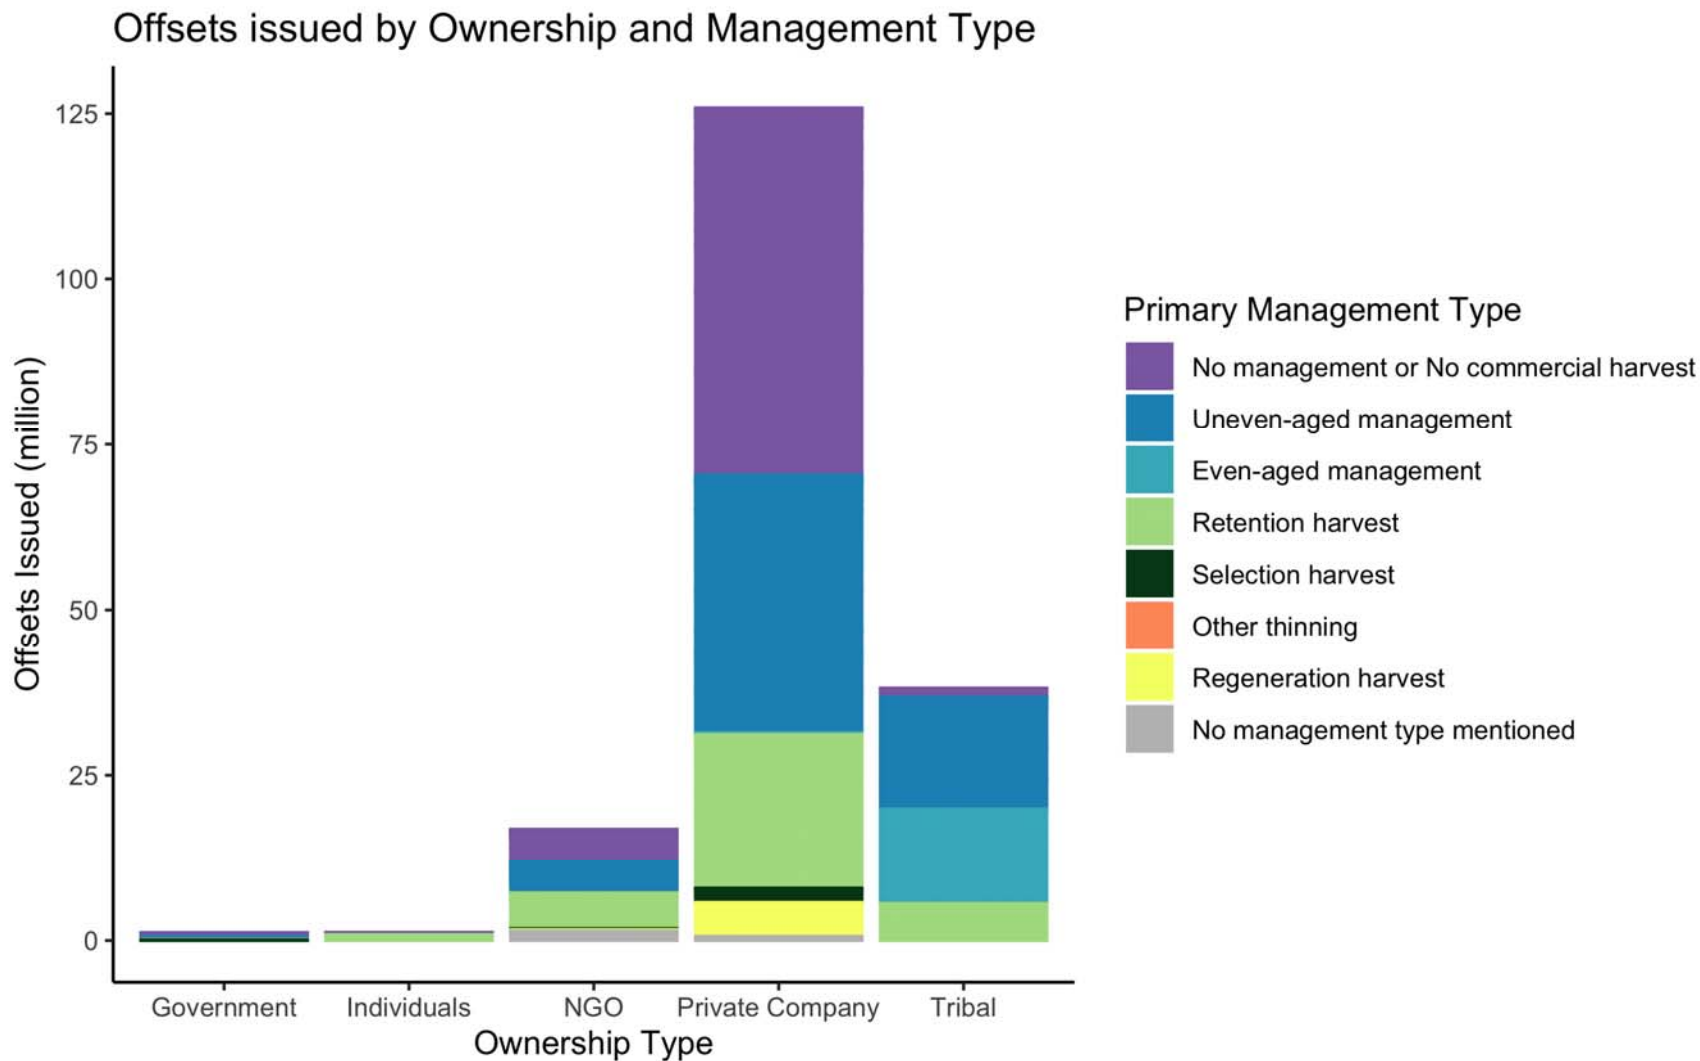

**Figure 2** Forest carbon offsets issued per ownership group and forest management type. See Table 1 for descriptions of different types of forest management.

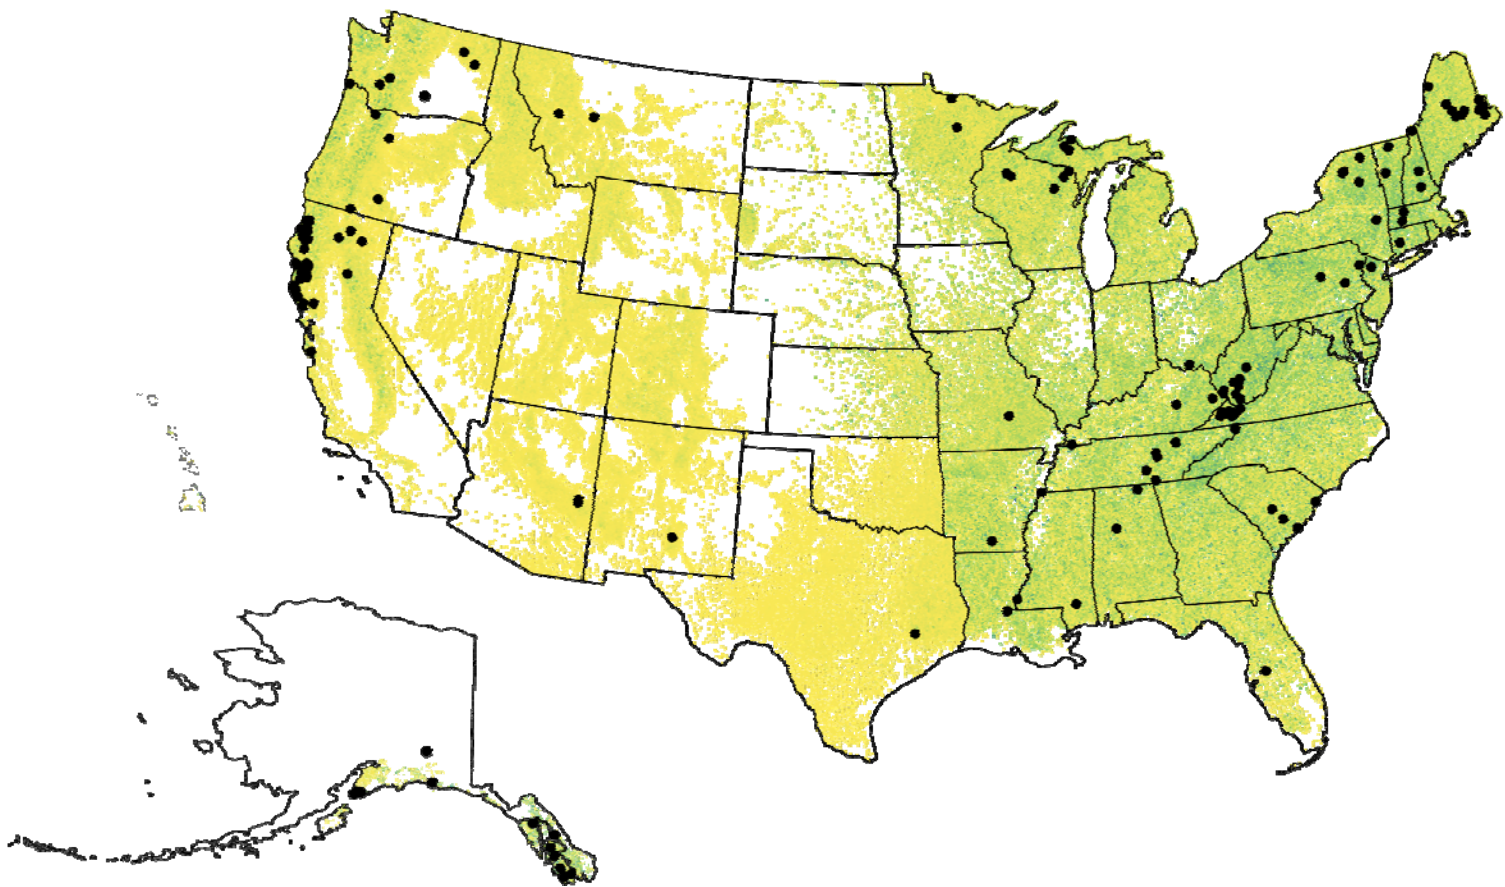

Aboveground Carbon  
(tons per acre)

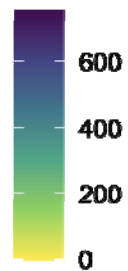

0 500 1000 km

**Figure 3** Map of Aboveground Carbon in the United States with locations of existing forest carbon offset projects. Aboveground C (US tons  $ac^{-1}$ ) (n = 11,674,137) in the United States and locations of (black dots). Data used for figure is from USDA Forest Services National Forest Inventory data (n = the number of samples).

a)

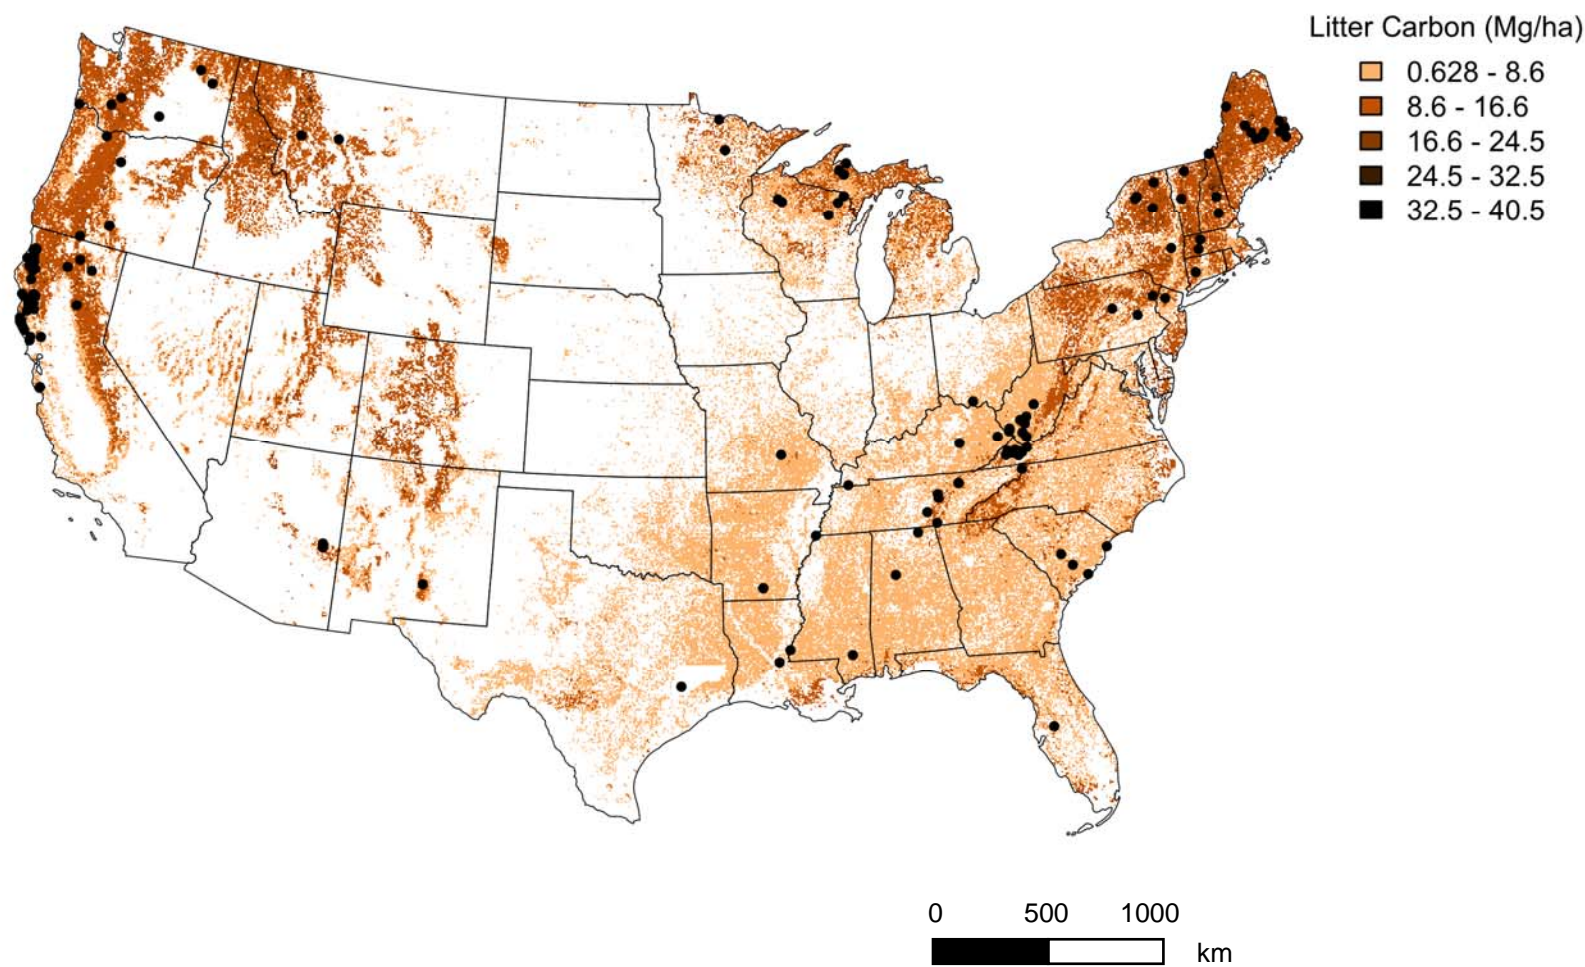

b)

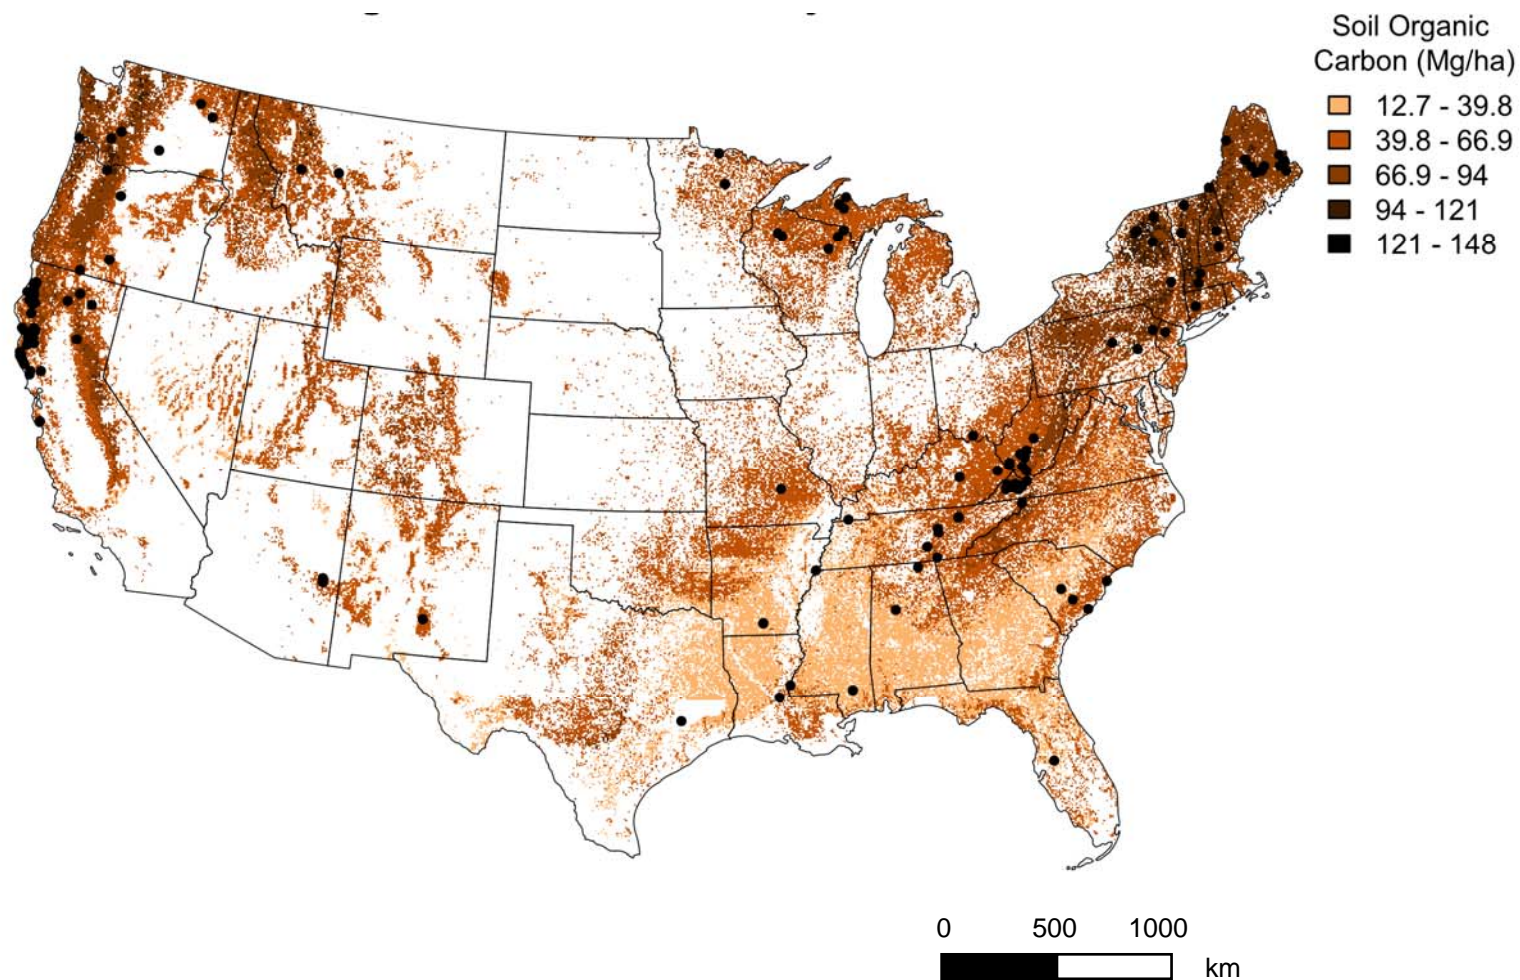

**Figure 4** (a) Litter Organic Carbon ( $\text{Mg ha}^{-1}$ ) ( $n= 3303$ ) and (b) Soil Organic Carbon (Megagrams  $\text{ha}^{-1}$ ) across continental United States and locations of existing forest carbon offset projects (black dots). Data used for figure is from USDA Forest Service National Forest Inventory data ( $n =$  the number of samples).

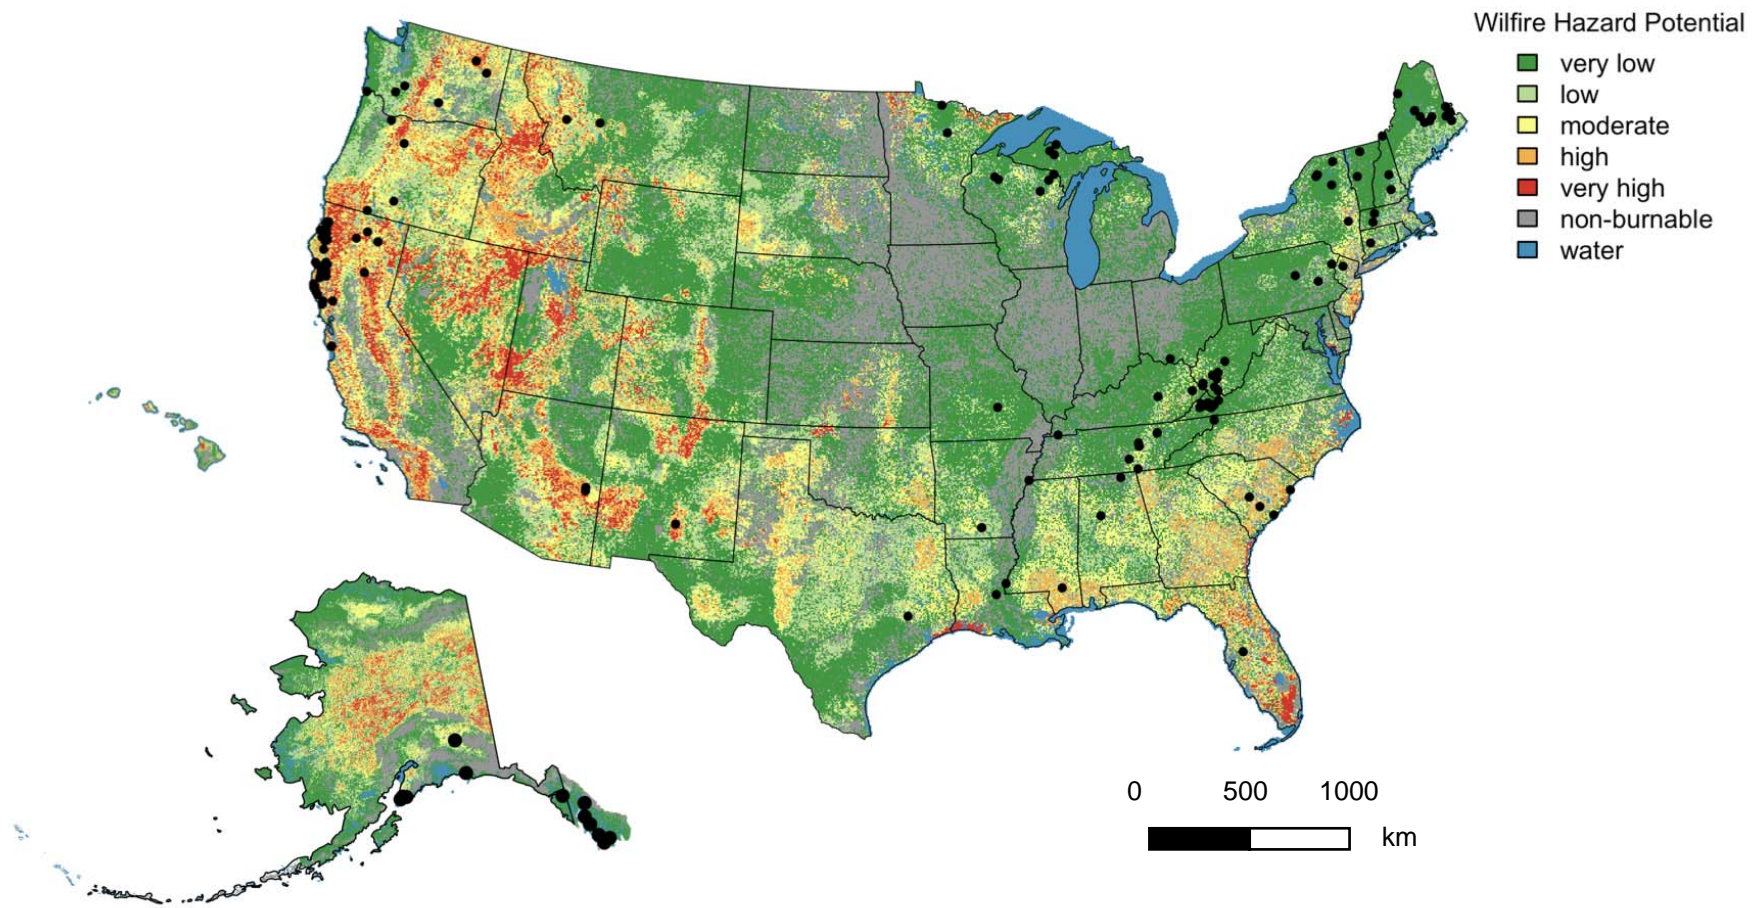

**Figure 5** Wildfire hazard potential (WHP) in the United States and locations of existing forest carbon offsets projects (black dots) (WHP based on Dillon et al., 2020).
